# Supplementary material for: Proton-displacive ferroelectricity in neutral cocrystals of anilic acids with phenazine
Source: Royal Society of Chemistry journal article supplement (doi:10.1039/b900987f), 2009-01-01
Supplement: b900987f2.pdf [file b900987f2.pdf]

## **Electronic supplementary information (ESI)**

### **Proton-Displacive Ferroelectricity in Neutral Cocrystals of Anilic Acids with Phenazine**

**Sachio Horiuchi,<sup>a</sup> Reiji Kumai<sup>a</sup> and Yoshinori Tokura<sup>abc</sup>**

*<sup>a</sup>National Institute of Advanced Industrial Science and Technology (AIST), Tsukuba, 305-8562, Japan*

*<sup>b</sup>Department of Applied Physics, The University of Tokyo, Tokyo 113-8656, Japan*

*<sup>c</sup>Multiferroics Project, ERATO, Japan Science and Technology Agency (JST), Tokyo 113-8656, Japan*

**Contents: Hydrogen-Bonded Parameters, Molecular Geometry, and Infrared Absorption Spectra of Phz-H<sub>2</sub>x<sub>a</sub> Cocrystals**

**Table S1.** Hydrogen-bond parameters of co-crystals at room temperature.

| Cocrystal                          | $d_{O\cdots N^{(1)}}/\text{\AA}$ | $d_{O\cdots N^{(2)}}/\text{\AA}$ | $\theta(^{\circ})$ | Dihedral angle $\phi(^{\circ})$ | Ref. |
|------------------------------------|----------------------------------|----------------------------------|--------------------|---------------------------------|------|
| Phz-H <sub>2</sub> ca ( $\alpha$ ) | 2.724(2)                         | 3.461(2)                         | 132                | 44.42(2)                        | 1    |
| Phz-D <sub>2</sub> ca ( $\alpha$ ) | 2.732(3)                         | 3.474(3)                         | 138                | 44.32(3)                        | 1    |
| Phz-H <sub>2</sub> ba ( $\alpha$ ) | 2.744(5)                         | 3.421(4)                         | 138                | 44.57(5)                        | 1    |
| Phz-D <sub>2</sub> ba ( $\alpha$ ) | 2.757(4)                         | 3.437(3)                         | 119                | 44.53(4)                        | 1    |
| Phz-H <sub>2</sub> ba ( $\beta$ )  | 2.670(4)                         | 2.996(5)                         | 155                | 86.99(5)                        | †    |
| Phz-H <sub>2</sub> fa ( $\alpha$ ) | 2.697(2)                         | 3.410(2)                         | 150                | 45.63(2)                        | †    |
| Phz-H <sub>2</sub> fa ( $\gamma$ ) | 2.672(2)                         | 3.136(3)                         | 155                | 68.73(4)                        | †    |
| Phz-H <sub>2</sub> ia ( $\beta$ )  | 2.675(4)                         | 2.967(5)                         | 159                | 88.37(4)                        | †    |

**Table S2.** Molecular geometry at hydrogen bonding sites in co-crystals.

| Neutral crystals                   | C–OH                            | C=O            | C–C            | C=C               | Ref.     |   |
|------------------------------------|---------------------------------|----------------|----------------|-------------------|----------|---|
| H <sub>2</sub> fa                  | 1.334                           | 1.215          | 1.496          | 1.332             | 2        |   |
| H <sub>2</sub> ca                  | 1.322                           | 1.222          | 1.501          | 1.346             | 3        |   |
| H <sub>2</sub> ba                  | 1.323                           | 1.225          | 1.504          | 1.347             | 4        |   |
| H <sub>2</sub> ia                  | 1.327                           | 1.223          | 1.508          | 1.345             | 5        |   |
| Co-crystals                        | Geometry for OH $\cdots$ N form |                |                |                   |          |   |
| $e/\text{\AA}$                     | $f/\text{\AA}$                  | $g/\text{\AA}$ | $h/\text{\AA}$ | $\phi/\text{deg}$ |          |   |
| Phz-H <sub>2</sub> ca ( $\alpha$ ) | 1.305(2)                        | 1.229(3)       | 1.508(3)       | 1.355(3)          | 118.3(1) | 1 |
| Phz-D <sub>2</sub> ca ( $\alpha$ ) | 1.304(3)                        | 1.215(4)       | 1.514(4)       | 1.352(4)          | 118.0(2) | 1 |
| Phz-H <sub>2</sub> ba ( $\alpha$ ) | 1.313(5)                        | 1.222(7)       | 1.514(6)       | 1.348(7)          | 117.9(4) | 1 |
| Phz-D <sub>2</sub> ba ( $\alpha$ ) | 1.314(3)                        | 1.212(5)       | 1.524(5)       | 1.342(5)          | 118.4(3) | 1 |
| Phz-H <sub>2</sub> ba ( $\beta$ )  | 1.313(6)                        | 1.221(4)       | 1.507(6)       | 1.347(5)          | 118.5(3) | † |
| Phz-H <sub>2</sub> fa ( $\alpha$ ) | 1.315(2)                        | 1.220(2)       | 1.499(2)       | 1.346(2)          | 117.9(1) | † |
| Phz-H <sub>2</sub> fa ( $\gamma$ ) | 1.330(3)                        | 1.227(3)       | 1.482(4)       | 1.341(3)          | 118.4(2) | † |
| Phz-H <sub>2</sub> ia ( $\beta$ )  | 1.317(5)                        | 1.217(4)       | 1.519(5)       | 1.346(5)          | 118.1(3) | † |

†this work

See right for definition of geometry parameters.

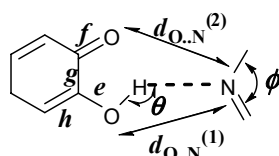

## Reference

- 1) S. Horiuchi, R. Kumai and Y. Tokura, *J. Am. Chem. Soc.*, 2005, **127**, 5010-5011.
- 2) E. K. Andersen, I. G. K. Andersen, *Acta Cryst. B*, 1975, **31**, 384-387.
- 3) E. K. Andersen, *Acta Cryst.*, 1967, **22**, 188-191.
- 4) C. Robl, *Z. Krist.*, 1987, **180**, 249-253.
- 5) C. Robl, *Z. Krist.*, 1988, **184**, 295-300.
